# Supplementary material
Source: MDPI journal article supplement (https://www.mdpi.com/2311-5637/9/2/157)
Supplement: s1 [file s1]

Supplementary

## Chemical profile and antioxidant properties of artisanal jabuticaba (*Plinia jabuticaba*) wine

Raissa Lima<sup>1,ψ</sup>, Ellis Helena B. C. Macedo<sup>1,ψ</sup>, Michele N. Santana<sup>2</sup>, Ana Claudia F. Amaral<sup>3</sup>, Jefferson R. A. Silva<sup>4</sup>, Pollyane G. Corrêa<sup>4</sup>, Ronoel Luiz O. Godoy<sup>5</sup>, Manuela Cristina P. A. Santiago<sup>5</sup>, Marcos Vinicius T. Silva<sup>1</sup>, Brendo A. Gomes<sup>6</sup>, Suzana G. Leitão<sup>1,2</sup>, Rosineide C. Simas<sup>7,8</sup>, Carla S. Carneiro<sup>2,\*</sup>, and Igor A. Rodrigues<sup>1,2,\*</sup>

- <sup>1</sup> Programa de Pós-graduação em Ciências Farmacêuticas, Faculdade de Farmácia, Universidade Federal do Rio de Janeiro, Rio de Janeiro 21941-902, RJ, Brazil;
- <sup>2</sup> Departamento de Produtos Naturais e Alimentos, Faculdade de Farmácia, Universidade Federal do Rio de Janeiro, Rio de Janeiro 21941-902, RJ, Brazil;
- <sup>3</sup> Departamento de Produtos Naturais, Farmanguinhos Fiocruz, Manguinhos, Rio de Janeiro 21041-250, RJ, Brazil;
- <sup>4</sup> Departamento de Química, Universidade Federal do Amazonas, Japiim, Manaus 69077-00, AM, Brazil; jrocha\_01@ufam.edu.br
- <sup>5</sup> Embrapa Agroindústria de Alimentos, Rio de Janeiro 23020-470, RJ, Brazil;
- <sup>6</sup> Programa de Pós-graduação em Biotecnologia Vegetal, Universidade Federal do Rio de Janeiro, Rio de Janeiro 21941-902, RJ, Brazil;
- <sup>7</sup> Laboratório de Cromatografia e Espectrometria de Massas (LaCEM), Universidade Federal de Goiás, Goiânia 74.690-900, GO, Brazil;
- <sup>8</sup> Escola Presbiteriana Mackenzie, Escola de Engenharia, Instituto Mackenzie, Higienópolis 01302-907, SP, Brazil.

\* Correspondence: IAR, igor@pharma.ufrj.br; CSC, carlacarneiro@pharma.ufrj.br

ψ These authors contributed equally to this work.

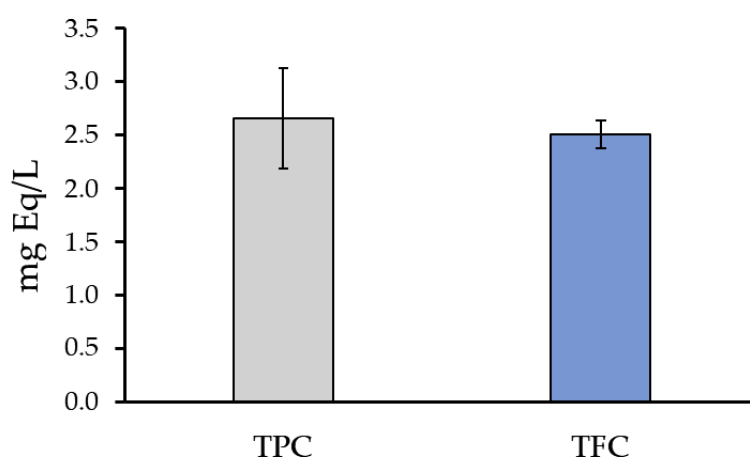

**Figure S1.** Total phenolic (TPC) and flavonoid (TFC) contents of jabuticaba wine extract (JWE). TPC result is expressed as mg GAE/L of wine. TFC result is expressed as mg QE/L of wine. The bars represent the mean values  $\pm$  standard deviation of three independent experiments.

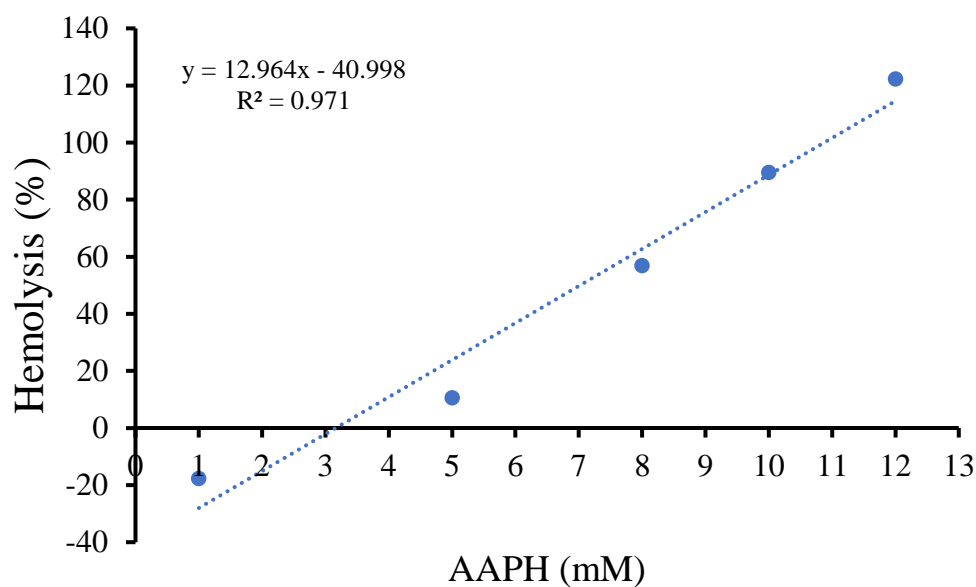

**Figure S2.** Determination of half maximum concentration for the hemolysis induced by AAPH oxidative stress (OC<sub>50</sub>). The dose-response curve was generated using the mean values of four independent experiments. The linear regression analysis of the data resulted in an OC<sub>50</sub> value of 7.0 mM.

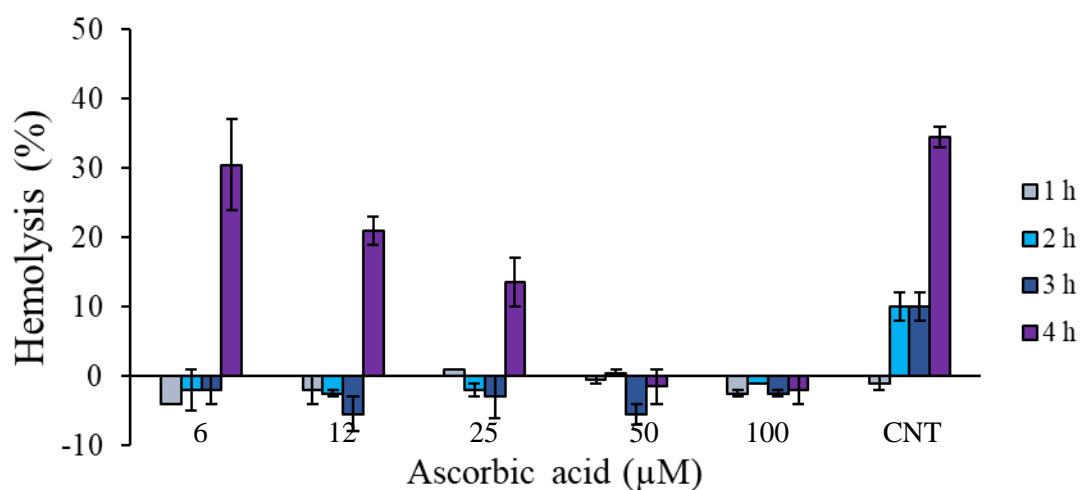

**Figure S3.** Hematoprotective effect of ascorbic acid against the hemolysis induced by AAPH oxidative stress. Sheep erythrocytes were treated with ascorbic acid and then challenged with 7.0 mM AAPH (OC<sub>50</sub>). The minor concentration of ascorbic acid able to provide sub-maximal protection of erythrocytes against oxidative stress was selected as control of antioxidant activity.



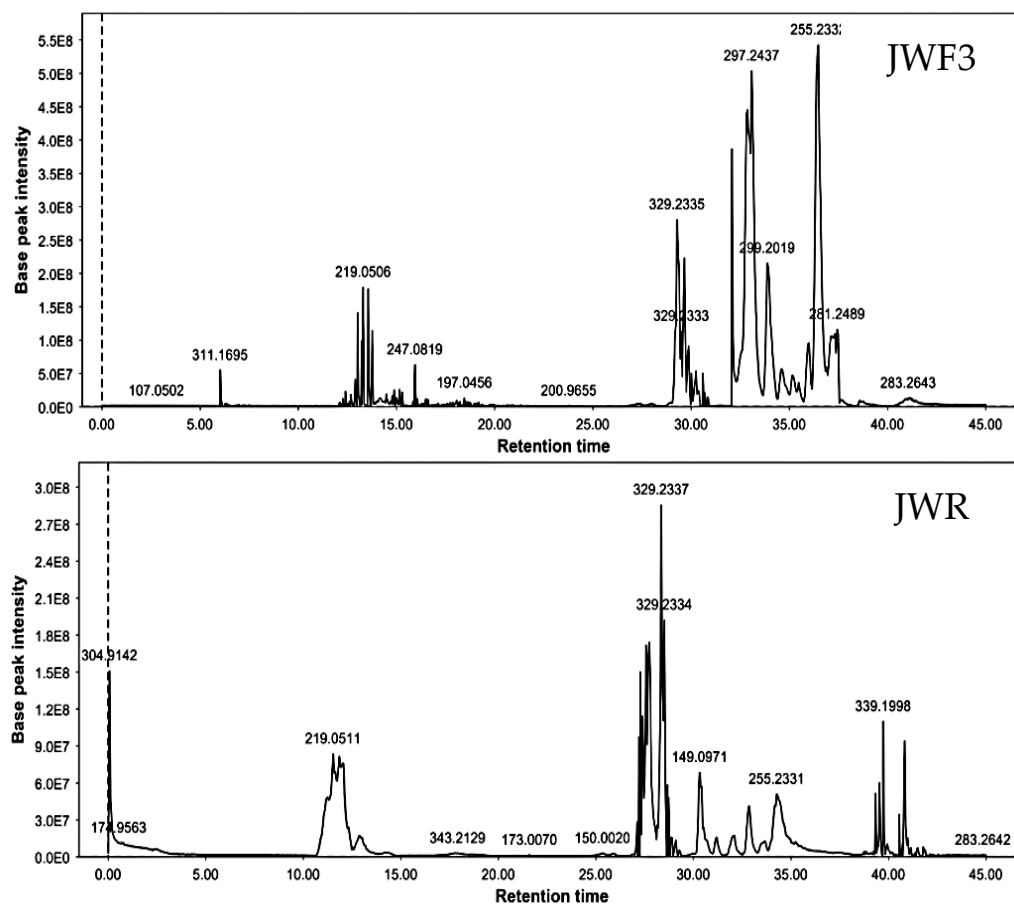

**Figure S4 (continuation).** Jabuticaba wine extract (JWE), fractions (JWF1-3), and residue (JWR) chromatograms obtained by HPLC-HRMS/MS analysis in negative ionization mode.

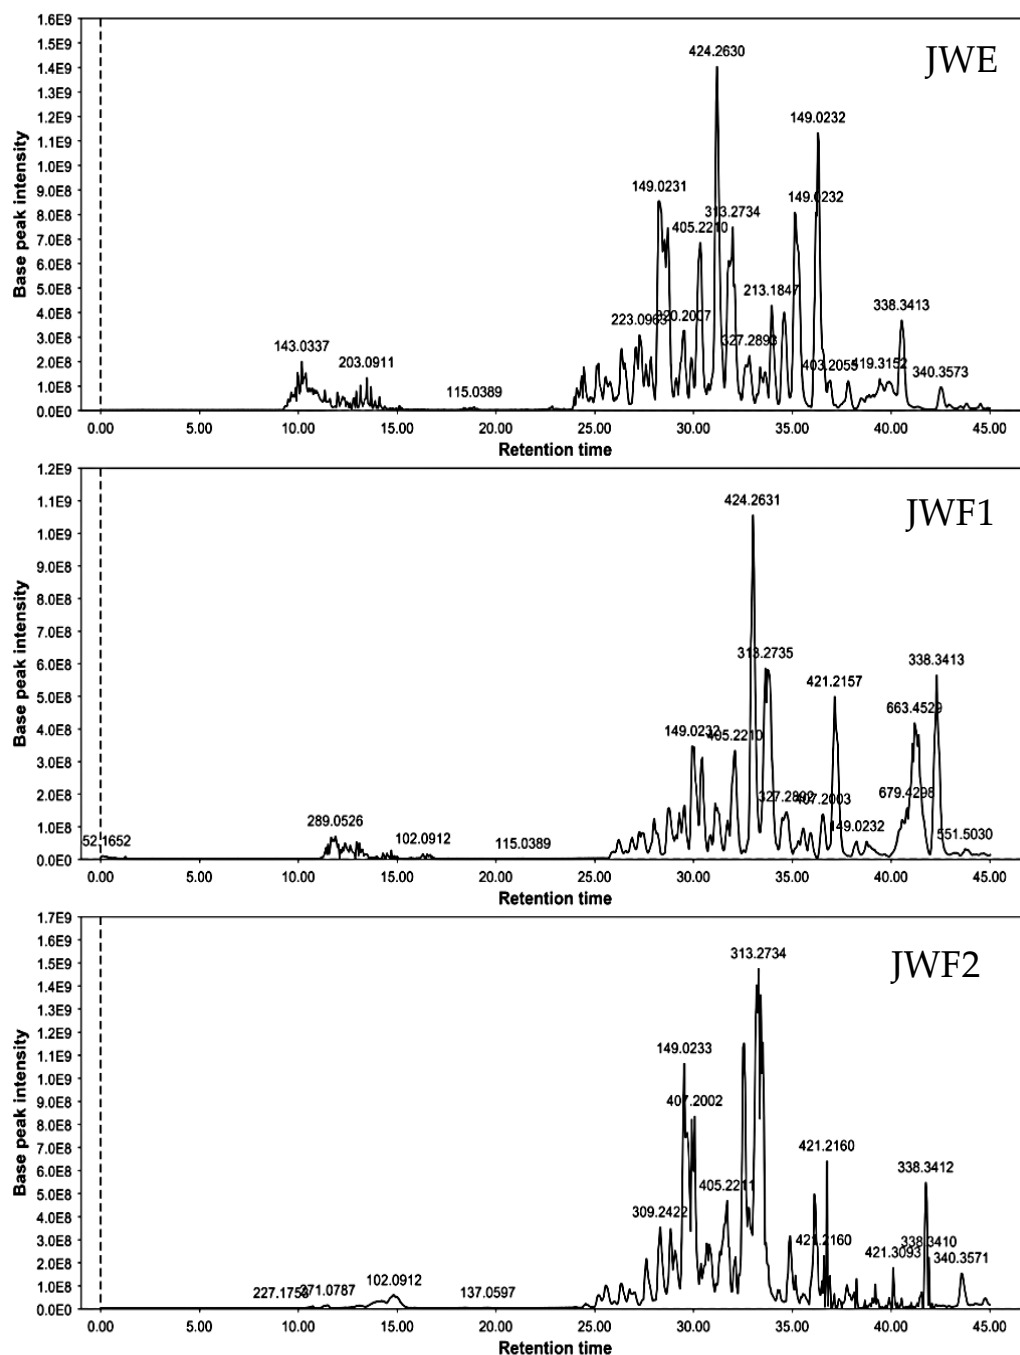

**Figure S5.** Jaboticaba wine extract (JWE), fractions (JWF1-3), and residue (JWR) chromatograms obtained by HPLC-HRMS/MS analysis in positive ionization mode.

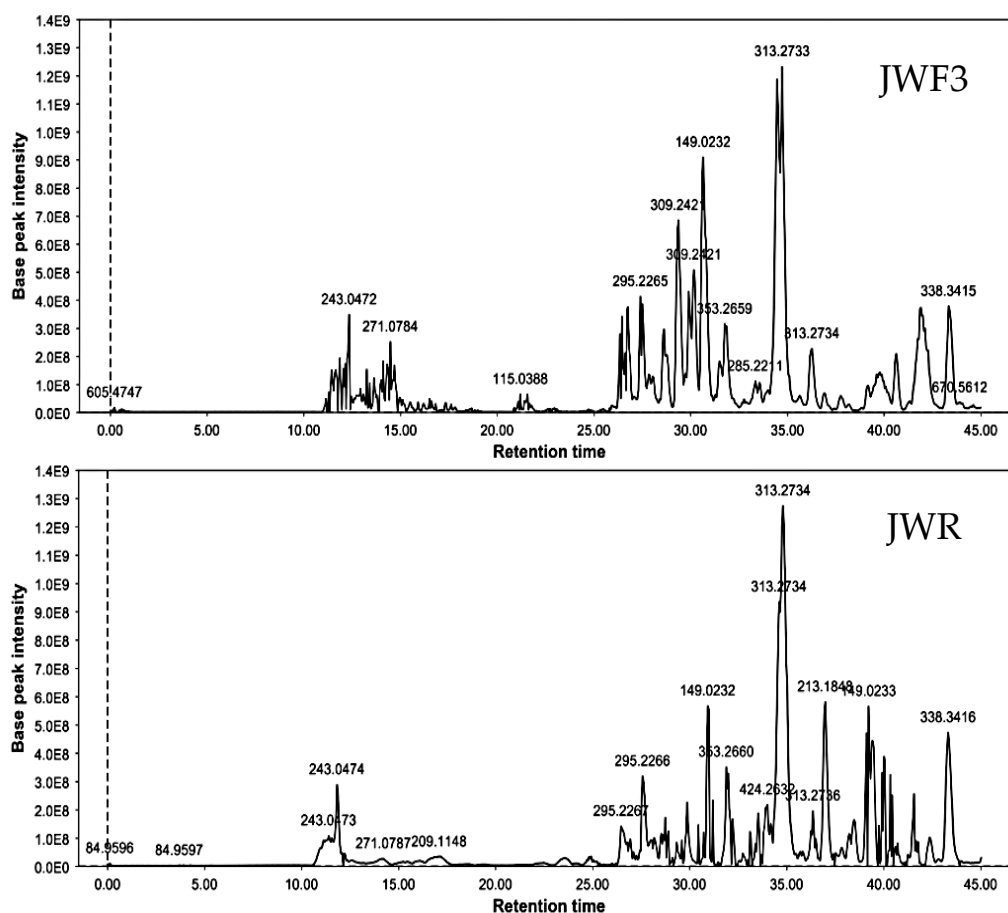

**Figure S5 (continuation).** Jabuticaba wine extract (JWE), fractions (JWF1-3), and residue (JWR) chromatograms obtained by HPLC-HRMS/MS analysis in positive ionization mode.

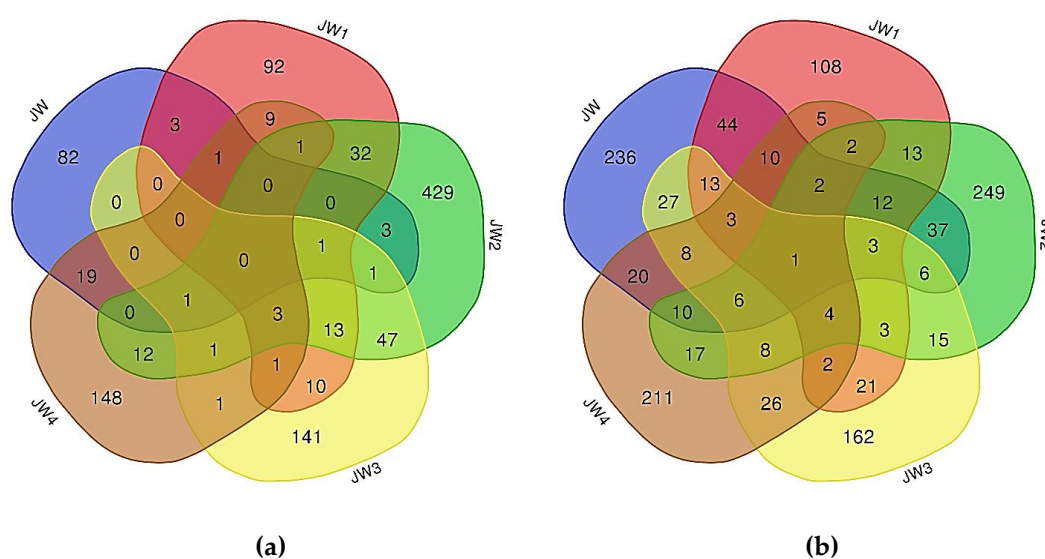

**Figure S6.** Venn diagram of the total ions obtained from HPLC-MS/MS data. (a) Data obtained in negative ionization mode; (b) Data obtained in positive ionization mode.
